# Supplementary material
Source: PubMed Central journal article supplement (PMC16879)

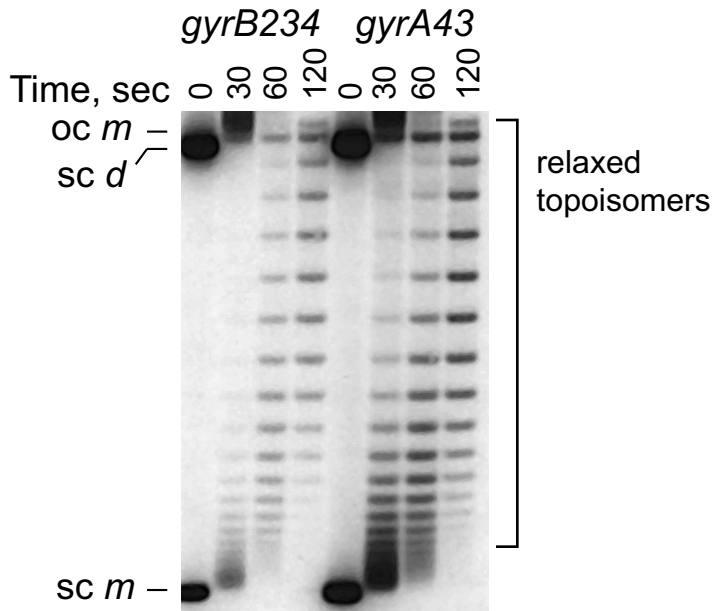

Supplement: pnas_97_17_9419__3.pdf [file pnas_97_17_9419__3.pdf]
